# Supplementary material for: Comparison of Glucose Tolerance between Kidney Transplant Recipients and Healthy Controls
Source: MDPI journal article supplement (doi:10.3390/jcm8070920), 2019-06-27
Supplement: s1 [file s1]

**Supplementary Materials:**

KTRs who did not decline to be evaluated using 75g-OGTT in the study.

(n=101)

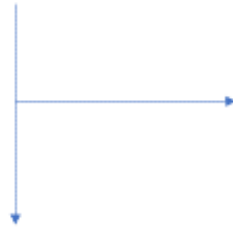

94 KTRs were enrolled.

- 2 KTRs with abnormal thyroid tests were excluded.
- 2 KTRs who tested positive for hepatitis B virus surface antigen were excluded.
- 3 KTRs who tested positive for hepatitis C virus antibody were excluded.

**Supplementary Figure 1.** Flow chart of patients' enrollment.

**Supplementary Table 1.** Clinical parameters of kidney transplant recipients.

| Variables                                   | KTR group                   |
|---------------------------------------------|-----------------------------|
|                                             | Median [IQR] or %<br>n = 94 |
| Dialysis duration (years)                   | 2.3 [0.8,6.6]               |
| Weight gain after KTx (kg)                  | 1.0 [-2.5,3.0]              |
| Vitamin D deficiency (%)                    | 3.2                         |
| High pre-KTx triglyceride concentration (%) | 16.0                        |
| Hyperuricaemia (%)                          | 33.0                        |
| Acute rejection (%)                         | 23.4                        |
| CMV infection (%)                           | 27.7                        |
| Cause of end-stage renal disease            |                             |
| Chronic glomerulonephritis (%)              | 39.4                        |
| IgA nephropathy (%)                         | 13.8                        |
| Nephrosclerosis (%)                         | 3.2                         |
| ADPKD (%)                                   | 3.2                         |
| Other or unknown (%)                        | 40.4                        |
| Immunosuppression                           |                             |
| Methylprednisolone (%)                      | 96.8                        |
| Mycophenolate mofetil (%)                   | 84.0                        |
| Mizoribine (%)                              | 8.5                         |
| Azathioprine (%)                            | 7.5                         |
| Everolimus (%)                              | 0                           |

KTR, kidney transplant recipients; KTx, kidney transplantation; CMV, cytomegalovirus; ADPKD, autosomal dominant polycystic kidney disease; IQR, interquartile range.
